# Supplementary material
Source: publisher figshare collection journal article supplement (https://tandf.figshare.com/ndownloader/files/21377841)
Supplement: Supplementary file 1 [file 21377841]

Figure S1 High expression of lncRNA HOXC-AS3 is and correlates with poor prognosis in human breast cancer.





Figure S2 The transwell assay and the matrigel invasion assay of T47D cells.**P < 0.01.
